# Supplementary material for: DRAMS: A tool to detect and re-align mixed-up samples for integrative studies of multi-omics data
Source: PLoS Comput Biol. 2020 Apr 13;16(4):e1007522. doi: 10.1371/journal.pcbi.1007522 (PMC7179940; doi:10.1371/journal.pcbi.1007522)
Supplement: S3 Table — (XLSX) [file pcbi.1007522.s011.xlsx]

## Sheet: S3 Table
Number of omics types	Proportion of mixed-up samples	Sample size	Proportion of corrected mix-ups (Summarized from 100 repeats for each dataset)							Proportion of overcorrected mix-ups (Summarized from 100 repeats for each dataset)
			Min	FirstQuantile	Median	Mean	ThirdQuantile	Max	SD	Min	FirstQuantile	Median	Mean	ThirdQuantile	Max	SD
3	0.05	50	0.333333	0.666667	1	0.91	1	1	0.156096	0	0	0	0	0	0	0
3	0.05	100	0.6	0.866667	1	0.915333	1	1	0.0984071	0	0	0	0	0	0	0
3	0.05	150	0.619048	0.904762	0.904762	0.922857	1	1	0.078284	0	0	0	0	0	0	0
3	0.05	200	0.633333	0.866667	0.933333	0.899	0.933333	1	0.0803268	0	0	0	0.00037037	0	0.037037	0.0037037
3	0.05	250	0.666667	0.833333	0.888889	0.905833	0.944444	1	0.0698384	0	0	0	0	0	0	0
3	0.05	300	0.733333	0.866667	0.911111	0.897556	0.955556	1	0.0657168	0	0	0	0	0	0	0
3	0.1	50	0.466667	0.733333	0.866667	0.81	0.866667	1	0.124767	0	0	0	0.00183333	0	0.1	0.0129523
3	0.1	100	0.6	0.733333	0.8	0.822	0.866667	1	0.092626	0	0	0	0.00216242	0	0.047619	0.00949045
3	0.1	150	0.555556	0.777778	0.822222	0.818	0.866667	1	0.0797612	0	0	0	0.00110532	0	0.0294118	0.00544714
3	0.1	200	0.633333	0.766667	0.833333	0.812167	0.866667	0.933333	0.0655999	0	0	0	0.00131812	0	0.0487805	0.00630218
3	0.1	250	0.666667	0.76	0.8	0.7996	0.84	0.92	0.0537511	0	0	0	0.00121608	0	0.0192308	0.00446144
3	0.1	300	0.677778	0.777778	0.811111	0.810111	0.844444	0.933333	0.0465305	0	0	0	0.000403652	0	0.0136986	0.00230702
3	0.15	50	0.52381	0.654762	0.714286	0.736667	0.809524	1	0.114353	0	0	0	0.00498092	0	0.153846	0.0213978
3	0.15	100	0.511111	0.688889	0.733333	0.730667	0.777778	0.911111	0.0732806	0	0	0	0.0020377	0	0.0571429	0.00850594
3	0.15	150	0.606061	0.681818	0.727273	0.727576	0.757576	0.848485	0.0549461	0	0	0	0.00190853	0	0.0243902	0.00612046
3	0.15	200	0.555556	0.677778	0.733333	0.719333	0.755556	0.822222	0.0582751	0	0	0	0.00144625	0	0.0188679	0.0046407
3	0.15	250	0.621622	0.702703	0.72973	0.730451	0.756757	0.855856	0.0468853	0	0	0	0.00111279	0	0.0135135	0.00356186
3	0.15	300	0.62963	0.694444	0.718519	0.722222	0.748148	0.837037	0.0461633	0	0	0	0.00020726	0	0.0104167	0.00145815
3	0.2	50	0.333333	0.6	0.633333	0.638667	0.7	0.866667	0.0908521	0	0	0	0.00763425	0	0.117647	0.0209617
3	0.2	100	0.5	0.583333	0.65	0.650333	0.7	0.833333	0.0733968	0	0	0	0.00187754	0	0.03125	0.0069074
3	0.2	150	0.477778	0.6	0.633333	0.637667	0.677778	0.766667	0.0598642	0	0	0	0.00228409	0	0.0350877	0.00646189
3	0.2	200	0.516667	0.608333	0.633333	0.641667	0.683333	0.758333	0.0523574	0	0	0	0.00202316	0	0.028169	0.00557904
3	0.2	250	0.493333	0.613333	0.653333	0.646933	0.68	0.746667	0.0491629	0	0	0	0.00122846	0	0.0192308	0.00362276
3	0.2	300	0.561111	0.615278	0.641667	0.641556	0.666667	0.744444	0.0402052	0	0	0	0.000766161	0	0.0153846	0.00268823
3	0.25	50	0.388889	0.527778	0.569445	0.578056	0.638889	0.833333	0.0967658	0	0	0	0.00715717	0	0.0666667	0.0180248
3	0.25	100	0.413333	0.53	0.56	0.566933	0.6	0.813333	0.0620916	0	0	0	0.00380569	0	0.05	0.0105965
3	0.25	150	0.432432	0.531532	0.563064	0.569099	0.594595	0.693694	0.0462405	0	0	0	0.00410434	0	0.0333333	0.00790653
3	0.25	200	0.446667	0.531667	0.553333	0.558867	0.593333	0.673333	0.0460035	0	0	0	0.0029597	0	0.0238095	0.00544455
3	0.25	250	0.462366	0.537634	0.567204	0.563656	0.592742	0.666667	0.0433739	0	0	0	0.00222634	0	0.010989	0.0041042
3	0.25	300	0.471111	0.533333	0.557778	0.558578	0.582222	0.644444	0.0342806	0	0	0	0.00152699	0	0.0148148	0.00334638
3	0.3	50	0.333333	0.444444	0.466667	0.482889	0.533333	0.666667	0.0690451	0	0	0	0.0171543	0.0421196	0.125	0.0279441
3	0.3	100	0.366667	0.455556	0.494445	0.497778	0.533333	0.711111	0.0599704	0	0	0	0.00767271	0.0163462	0.0952381	0.0153648
3	0.3	150	0.392593	0.459259	0.488889	0.49237	0.518519	0.6	0.0467355	0	0	0	0.00276951	0	0.025	0.00630992
3	0.3	200	0.4	0.459722	0.486111	0.486611	0.516667	0.561111	0.0375395	0	0	0	0.00227286	0	0.0222222	0.00506334
3	0.3	250	0.426667	0.475556	0.502222	0.498089	0.515556	0.582222	0.0320758	0	0	0	0.00323983	0.0078435	0.0294118	0.0061675
3	0.3	300	0.437037	0.474074	0.492593	0.494667	0.514815	0.592593	0.0291978	0	0	0	0.00245663	0.00698401	0.015748	0.00396199
4	0.05	50	0.625	1	1	0.99625	1	1	0.0375	0	0	0	0	0	0	0
4	0.05	100	0.85	1	1	0.99	1	1	0.0369274	0	0	0	0.00181818	0	0.181818	0.0181818
4	0.05	150	0.892857	1	1	0.995714	1	1	0.0211014	0	0	0	0	0	0	0
4	0.05	200	0.925	1	1	0.99325	1	1	0.0215718	0	0	0	0	0	0	0
4	0.05	250	0.916667	1	1	0.995625	1	1	0.0162983	0	0	0	0.0008	0	0.08	0.008
4	0.05	300	0.9	1	1	0.992	1	1	0.0209858	0	0	0	0.001674	0	0.0677966	0.00990338
4	0.1	50	0.75	1	1	0.9815	1	1	0.0515688	0	0	0	0.0032291	0	0.117647	0.0184988
4	0.1	100	0.775	0.925	1	0.96875	1	1	0.05117	0	0	0	0.0005	0	0.05	0.005
4	0.1	150	0.816667	0.95	1	0.967833	1	1	0.0417259	0	0	0	0.0024233	0	0.0677966	0.0111083
4	0.1	200	0.8125	0.9625	0.9625	0.969	1	1	0.0336388	0	0	0	0.00097561	0	0.0487805	0.00686367
4	0.1	250	0.91	0.97	0.97	0.975	1	1	0.0259565	0	0	0	0.00161335	0	0.0416667	0.00738673
4	0.1	300	0.9	0.95	0.975	0.970917	1	1	0.0273065	0	0	0	0.00105018	0	0.0344828	0.00484452
4	0.15	50	0.785714	0.892857	1	0.961071	1	1	0.0578989	0	0	0	0.00967724	0	0.2	0.0366482
4	0.15	100	0.783333	0.9	0.95	0.9375	1	1	0.0563267	0	0	0	0.00351156	0	0.103448	0.0145009
4	0.15	150	0.829545	0.926136	0.960227	0.945	0.965909	1	0.041861	0	0	0	0.00262285	0	0.047619	0.00951853
4	0.15	200	0.833333	0.925	0.95	0.940583	0.96875	1	0.0358216	0	0	0	0.00267808	0	0.0357143	0.00813862
4	0.15	250	0.844595	0.918919	0.949325	0.945	0.97973	1	0.0347861	0	0	0	0.00115428	0	0.0277778	0.0044035
4	0.15	300	0.833333	0.916667	0.933333	0.933722	0.951389	1	0.0331388	0	0	0	0.00193501	0	0.0348837	0.00655309
4	0.2	50	0.725	0.85	0.925	0.9015	1	1	0.0775102	0	0	0	0.0139673	0	0.195122	0.0381728
4	0.2	100	0.725	0.85	0.8875	0.89375	0.925	1	0.0516	0	0	0	0.00481536	0	0.057971	0.0132301
4	0.2	150	0.75	0.875	0.9	0.895083	0.925	0.975	0.0439061	0	0	0	0.00592861	0	0.0808081	0.0128423
4	0.2	200	0.73125	0.86875	0.89375	0.892312	0.925	0.98125	0.0406491	0	0	0	0.00350866	0	0.0289855	0.00805864
4	0.2	250	0.82	0.88	0.895	0.8982	0.925	0.97	0.0318814	0	0	0	0.0033355	0	0.0238095	0.0064176
4	0.2	300	0.791667	0.875	0.9	0.897458	0.916667	0.979167	0.0323557	0	0	0	0.00139882	0	0.0206186	0.00408534
4	0.25	50	0.625	0.8125	0.875	0.876458	0.9375	1	0.0736275	0	0	0	0.0160843	0	0.163265	0.0321691
4	0.25	100	0.7	0.82	0.85	0.853	0.8825	0.97	0.0565775	0	0	0	0.00963235	0.0229885	0.0842105	0.0174678
4	0.25	150	0.722973	0.817568	0.851351	0.848446	0.880067	0.945946	0.0501716	0	0	0	0.00444121	0	0.032	0.00841509
4	0.25	200	0.73	0.82375	0.8475	0.8442	0.865	0.935	0.0397576	0	0	0	0.00489269	0.011445	0.0363636	0.00851534
4	0.25	250	0.75	0.814516	0.840726	0.841774	0.866935	0.935484	0.0381679	0	0	0	0.00376703	0.00892857	0.0434783	0.00786817
4	0.25	300	0.776667	0.826667	0.846667	0.846633	0.87	0.91	0.0296576	0	0	0	0.00203596	0	0.016	0.0040972
4	0.3	50	0.65	0.75	0.8	0.805167	0.85	1	0.0764568	0	0	0	0.0221463	0.0416667	0.166667	0.0349279
4	0.3	100	0.666667	0.75	0.791667	0.784833	0.825	0.933333	0.0531602	0	0	0	0.0139097	0.021978	0.0879121	0.0193641
4	0.3	150	0.627778	0.75	0.777778	0.782278	0.818056	0.866667	0.0458102	0	0	0	0.00652688	0.0138413	0.0428571	0.0105013
4	0.3	200	0.670833	0.758333	0.7875	0.785792	0.8125	0.895833	0.0421025	0	0	0	0.00487752	0.0103898	0.0359281	0.00767079
4	0.3	250	0.71	0.766667	0.786667	0.785033	0.806667	0.866667	0.0323404	0	0	0	0.00489706	0.00856543	0.025641	0.0065625
4	0.3	300	0.713889	0.765972	0.783333	0.783222	0.8	0.855556	0.0304493	0	0	0	0.00353613	0.00704847	0.0350877	0.00589033
5	0.05	50	1	1	1	1	1	1	0	0	0	0	0	0	0	0
5	0.05	100	0.88	1	1	0.9988	1	1	0.012	0	0	0	0.0012	0	0.12	0.012
5	0.05	150	1	1	1	1	1	1	0	0	0	0	0	0	0	0
5	0.05	200	1	1	1	1	1	1	0	0	0	0	0	0	0	0
5	0.05	250	0.933333	1	1	0.999333	1	1	0.0066667	0	0	0	0	0	0	0
5	0.05	300	1	1	1	1	1	1	0	0	0	0	0	0	0	0
5	0.1	50	0.84	1	1	0.9884	1	1	0.0399171	0	0	0	0.0061537	0	0.185185	0.0309488
5	0.1	100	0.92	1	1	0.9984	1	1	0.0112564	0	0	0	0	0	0	0
5	0.1	150	0.946667	1	1	0.996533	1	1	0.0128	0	0	0	0.0008	0	0.04	0.00562821
5	0.1	200	0.91	1	1	0.9952	1	1	0.0145976	0	0	0	0.000490196	0	0.0490196	0.00490196
5	0.1	250	0.936	1	1	0.99552	1	1	0.0128806	0	0	0	0	0	0	0
5	0.1	300	0.973333	1	1	0.995467	1	1	0.0100675	0	0	0	0	0	0	0
5	0.15	50	0.885714	1	1	0.992571	1	1	0.0274289	0	0	0	0.00309085	0	0.135135	0.0181014
5	0.15	100	0.893333	1	1	0.986	1	1	0.0268261	0	0	0	0.00325048	0	0.0422535	0.0110817
5	0.15	150	0.927273	1	1	0.991182	1	1	0.0162653	0	0	0	0.000991883	0	0.0446429	0.00584497
5	0.15	200	0.946667	0.973333	1	0.991333	1	1	0.0138779	0	0	0	0.000810958	0	0.0205479	0.00399326
5	0.15	250	0.913514	0.978378	1	0.987892	1	1	0.0167113	0	0	0	0.00178739	0	0.0529101	0.00698597
5	0.15	300	0.946667	0.982222	0.982222	0.985289	1	1	0.0151964	0	0	0	0.00164969	0	0.0224215	0.00519835
5	0.2	50	0.9	0.94	1	0.9768	1	1	0.0352446	0	0	0	0.0097675	0	0.0961538	0.0272704
5	0.2	100	0.88	0.96	0.96	0.9702	1	1	0.031686	0	0	0	0.00278474	0	0.0537634	0.0105889
5	0.2	150	0.846667	0.946667	0.973333	0.9714	1	1	0.0273201	0	0	0	0.00234465	0	0.0413793	0.00782019
5	0.2	200	0.9	0.96	0.98	0.97265	0.985	1	0.0223771	0	0	0	0.00321224	0	0.040404	0.00790072
5	0.2	250	0.916	0.952	0.968	0.96948	0.984	1	0.0187328	0	0	0	0.00380594	0	0.0240964	0.00747299
5	0.2	300	0.91	0.96	0.973333	0.9708	0.986667	1	0.0190346	0	0	0	0.00262953	0	0.0333333	0.00641035
5	0.25	50	0.7	0.929167	0.95	0.949	1	1	0.0575315	0	0	0	0.0206756	0	0.207547	0.0416324
5	0.25	100	0.824	0.936	0.968	0.9532	0.976	1	0.0411609	0	0	0	0.0092144	0	0.108333	0.0199412
5	0.25	150	0.848649	0.935135	0.956757	0.954865	0.978378	1	0.0329682	0	0	0	0.00545406	0	0.0540541	0.0117636
5	0.25	200	0.864	0.936	0.952	0.94864	0.968	1	0.0273708	0	0	0	0.00567096	0.0122583	0.0401606	0.0096466
5	0.25	250	0.896774	0.941935	0.958065	0.956258	0.974194	1	0.0220285	0	0	0	0.00222097	0	0.0436242	0.00635716
5	0.25	300	0.901333	0.936	0.948	0.948293	0.965333	0.992	0.0211198	0	0	0	0.00311632	0.00828729	0.0266667	0.00534418
5	0.3	50	0.786667	0.893333	0.946667	0.924533	0.96	1	0.0604724	0	0	0	0.0201632	0.0422535	0.117647	0.0323348
5	0.3	100	0.786667	0.893333	0.92	0.918133	0.946667	1	0.0419831	0	0	0	0.00997556	0.0212022	0.057554	0.0149205
5	0.3	150	0.835556	0.892222	0.911111	0.914222	0.946667	0.982222	0.0338567	0	0	0	0.0068652	0.0144231	0.0394089	0.0101722
5	0.3	200	0.853333	0.903333	0.92	0.920767	0.943333	0.973333	0.0280526	0	0	0	0.00448426	0.0106007	0.0228137	0.00708038
5	0.3	250	0.861333	0.904	0.921334	0.92064	0.936	0.970667	0.0242816	0	0	0	0.00565342	0.0088561	0.0308989	0.00781658
5	0.3	300	0.853333	0.901667	0.92	0.914889	0.931111	0.955556	0.0230389	0	0	0	0.00481304	0.00733496	0.0421836	0.00733646
6	0.05	50	1	1	1	1	1	1	0	0	0	0	0	0	0	0
6	0.05	100	1	1	1	1	1	1	0	0	0	0	0	0	0	0
6	0.05	150	1	1	1	1	1	1	0	0	0	0	0	0	0	0
6	0.05	200	1	1	1	1	1	1	0	0	0	0	0	0	0	0
6	0.05	250	1	1	1	1	1	1	0	0	0	0	0	0	0	0
6	0.05	300	1	1	1	1	1	1	0	0	0	0	0	0	0	0
6	0.1	50	1	1	1	1	1	1	0	0	0	0	0	0	0	0
6	0.1	100	0.933333	1	1	0.999333	1	1	0.0066667	0	0	0	0.000666667	0	0.0666667	0.00666667
6	0.1	150	0.944444	1	1	0.998333	1	1	0.00952489	0	0	0	0.000898876	0	0.0449438	0.00632383
6	0.1	200	0.958333	1	1	0.99875	1	1	0.00714367	0	0	0	0.000336134	0	0.0336134	0.00336134
6	0.1	250	0.966667	1	1	0.999333	1	1	0.00469013	0	0	0	0	0	0	0
6	0.1	300	0.972222	1	1	0.999722	1	1	0.0027778	0	0	0	0	0	0	0
6	0.15	50	0.880952	1	1	0.997619	1	1	0.0167507	0	0	0	0.00097561	0	0.097561	0.0097561
6	0.15	100	0.944444	1	1	0.998111	1	1	0.00935036	0	0	0	0.00154106	0	0.0652174	0.00897045
6	0.15	150	0.962121	1	1	0.996742	1	1	0.0104539	0	0	0	0.00120087	0	0.0447761	0.00696161
6	0.15	200	0.972222	1	1	0.997389	1	1	0.0079143	0	0	0	0.000881562	0	0.032967	0.0051146
6	0.15	250	0.954955	1	1	0.995901	1	1	0.00914672	0	0	0	0.000988577	0	0.0267857	0.00440195
6	0.15	300	0.962963	1	1	0.996259	1	1	0.0081468	0	0	0	0.00118615	0	0.0224719	0.00479173
6	0.2	50	0.866667	1	1	0.986333	1	1	0.0322535	0	0	0	0.00789505	0	0.16129	0.0267262
6	0.2	100	0.916667	1	1	0.988833	1	1	0.0228822	0	0	0	0.00284705	0	0.0512821	0.0106451
6	0.2	150	0.944444	0.994444	1	0.992722	1	1	0.0135324	0	0	0	0.00278419	0	0.032967	0.00764686
6	0.2	200	0.945833	0.979167	1	0.991	1	1	0.0130386	0	0	0	0.00226356	0	0.0502092	0.00751387
6	0.2	250	0.966667	0.983333	1	0.994	1	1	0.00946376	0	0	0	0.00106781	0	0.020202	0.00399355
6	0.2	300	0.972222	0.986111	1	0.993333	1	1	0.0087575	0	0	0	0.000724741	0	0.0165746	0.00292528
6	0.25	50	0.861111	0.944444	1	0.9775	1	1	0.0359033	0	0	0	0.0112135	0	0.112676	0.0267636
6	0.25	100	0.9	0.966667	1	0.982267	1	1	0.023731	0	0	0	0.00747029	0	0.0657895	0.0159643
6	0.25	150	0.927928	0.977477	0.981982	0.983153	1	1	0.0184188	0	0	0	0.00377887	0	0.0273973	0.00830957
6	0.25	200	0.916667	0.97	0.983333	0.9826	1	1	0.0183957	0	0	0	0.0046126	0	0.0401338	0.00892296
6	0.25	250	0.946237	0.973118	0.986559	0.982231	0.986559	1	0.0134376	0	0	0	0.00212216	0	0.0426667	0.00609297
6	0.25	300	0.946667	0.975556	0.98	0.9806	0.988889	1	0.0124305	0	0	0	0.00206669	0	0.0223714	0.00503772
6	0.3	50	0.833333	0.944444	0.955556	0.964111	1	1	0.0400105	0	0	0	0.0164791	0.0444444	0.153846	0.0308493
6	0.3	100	0.888889	0.944444	0.972222	0.961444	0.972222	1	0.0281492	0	0	0	0.00734315	0.00555555	0.0564972	0.01404
6	0.3	150	0.903704	0.948148	0.962963	0.963815	0.981481	1	0.0215758	0	0	0	0.00570879	0.0148699	0.0536398	0.0100774
6	0.3	200	0.916667	0.958333	0.972222	0.970278	0.986111	1	0.0192551	0	0	0	0.0036891	0	0.0392157	0.00747146
6	0.3	250	0.922222	0.957778	0.968889	0.970245	0.978333	1	0.0162132	0	0	0	0.00377852	0.00909091	0.0361174	0.00680244
6	0.3	300	0.924074	0.962963	0.972222	0.97013	0.981481	1	0.0150666	0	0	0	0.00323432	0.00762268	0.0220588	0.00516765
